# Supplementary material for: Human β-D-3 Exacerbates MDA5 but Suppresses TLR3 Responses to the Viral Molecular Pattern Mimic Polyinosinic:Polycytidylic Acid
Source: PubMed Central journal article supplement (PMC4672878; doi:10.1371/journal.pgen.1005673), 2015-12-08

Figure S1A:

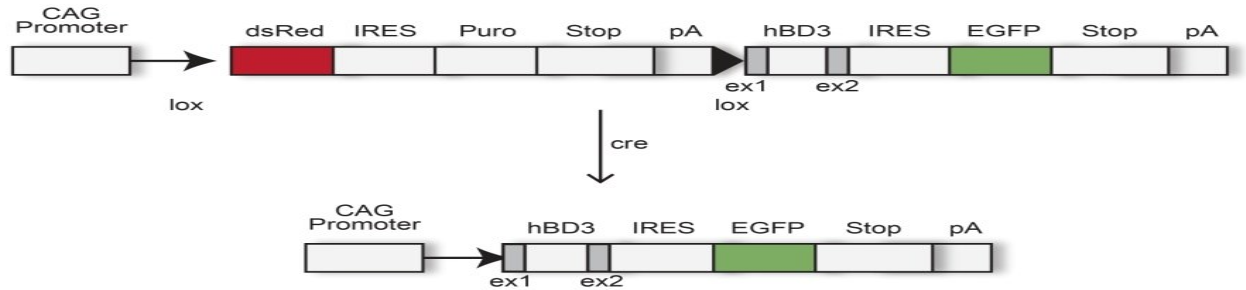

FigS1B.

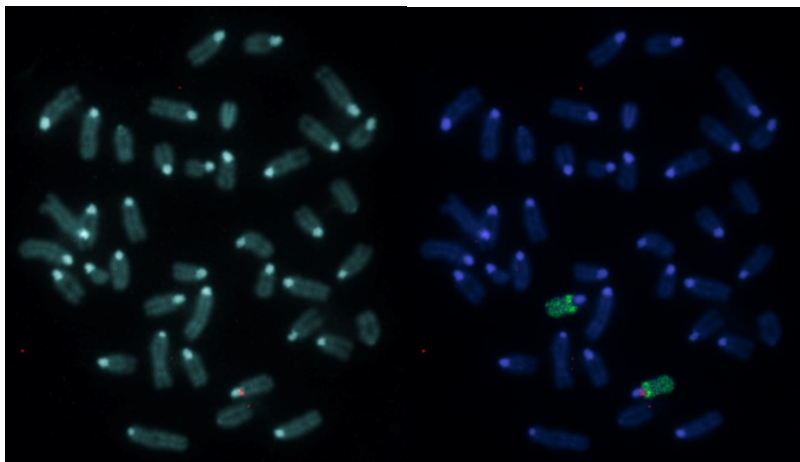

FISH with TxRd Labelled Plasmid

Mouse chromosome 12 paint

FigS1C.

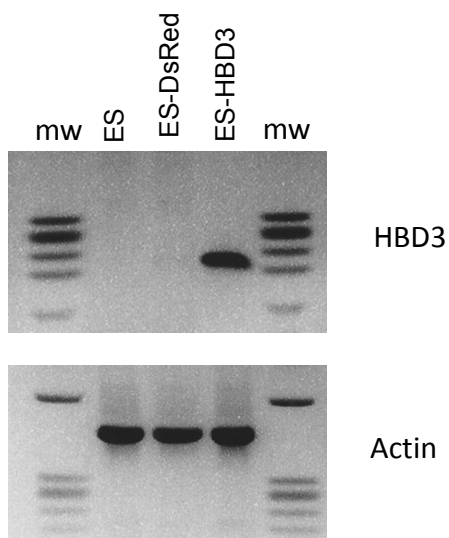

**Fig S1D**

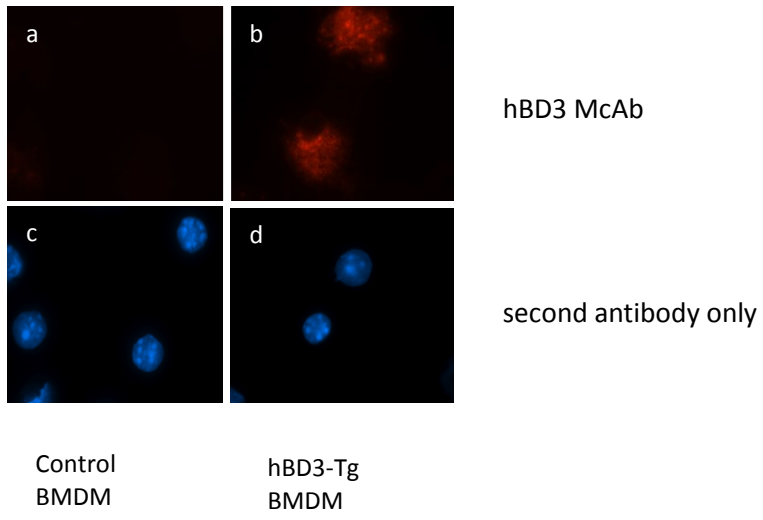

Supplement: pgen.1005673.s001.pdf [file pgen.1005673.s001.pdf]
