# Supplementary material for: Human β-D-3 Exacerbates MDA5 but Suppresses TLR3 Responses to the Viral Molecular Pattern Mimic Polyinosinic:Polycytidylic Acid
Source: PubMed Central journal article supplement (PMC4672878; doi:10.1371/journal.pgen.1005673), 2015-12-08
Supplement: pgen.1005673.s003.pdf [file pgen.1005673.s003.pdf]

**Figure S3:**

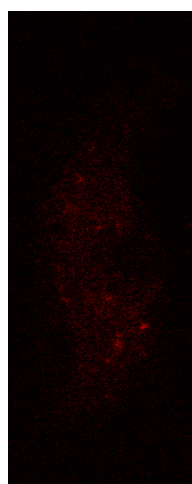

EEA-1  
pseudocoloured  
red

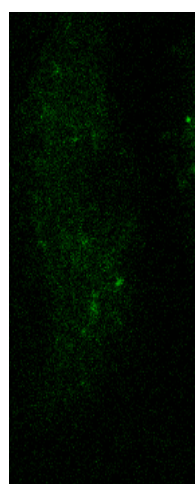

EEA-1  
pseudocoloured  
green

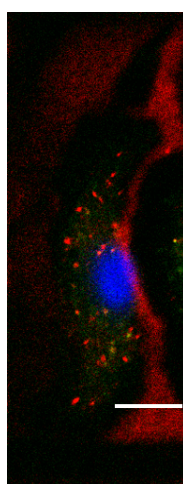

EEA-1  
pseudocoloured green;  
FITC-polyIC invisible;  
TAMRA-hBD3 red

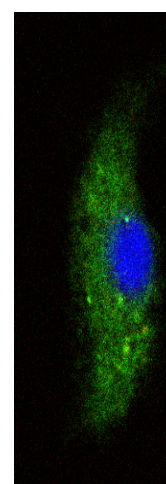

EEA-1 pseudocoloured  
red  
FITC-polyIC green  
TAMRA-hBD3 invisible
