# Supplementary material for: Human β-D-3 Exacerbates MDA5 but Suppresses TLR3 Responses to the Viral Molecular Pattern Mimic Polyinosinic:Polycytidylic Acid
Source: PubMed Central journal article supplement (PMC4672878; doi:10.1371/journal.pgen.1005673), 2015-12-08

Figure S4

A.

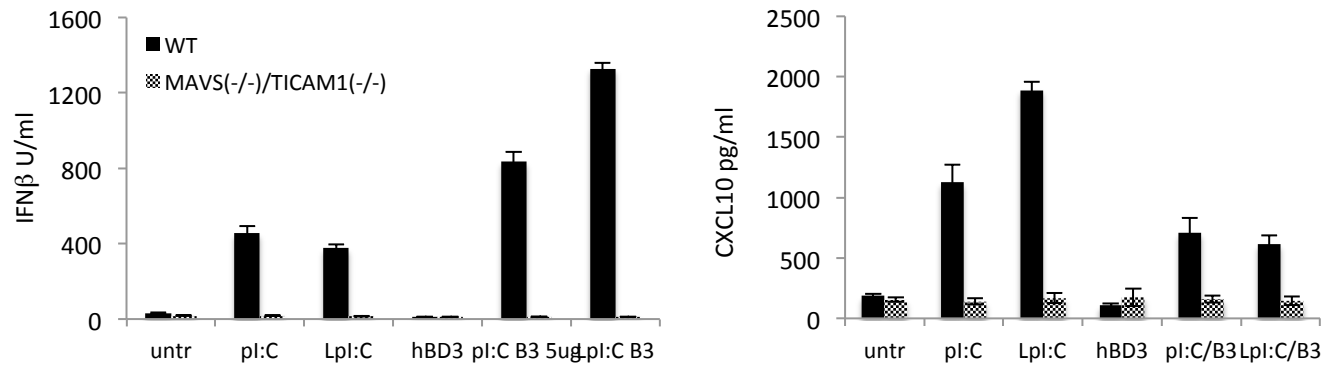

B.

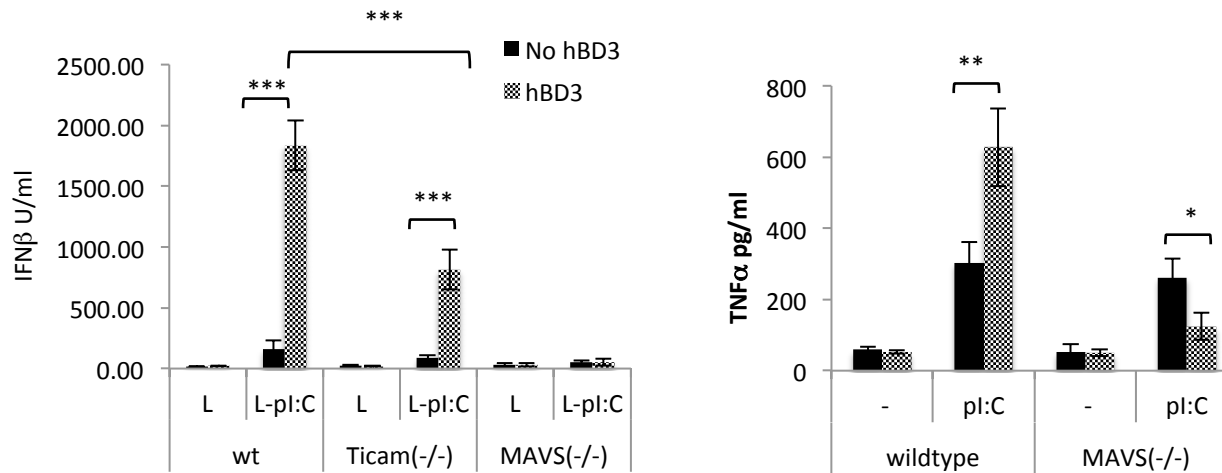

Supplement: pgen.1005673.s004.pdf [file pgen.1005673.s004.pdf]
